# Supplementary material for: Reduced leakage current and improved performance of an organic photodetector using an ytterbium cathode interlayer
Source: Royal Society of Chemistry journal article supplement (doi:10.1039/c6tc00415f), 2016-01-01
Supplement: c6tc00415f1.pdf [file c6tc00415f1.pdf]

## Reduced leakage current and improved performance of organic photodetector using a ytterbium cathode interlayer

Seong Bin Lim<sup>a</sup>, Chan Hyuk Ji<sup>a</sup>, Il Soo Oh<sup>a</sup> and Se Young Oh<sup>a</sup>

<sup>a</sup>Department of Chemical & Biomolecular Engineering, Sogang University, Seoul 121-742, Republic of Korea

E-mail: syoh@sogang.ac.kr

### Electronic Supplementary Material (ESI) for Journal of Materials Chemistry C.

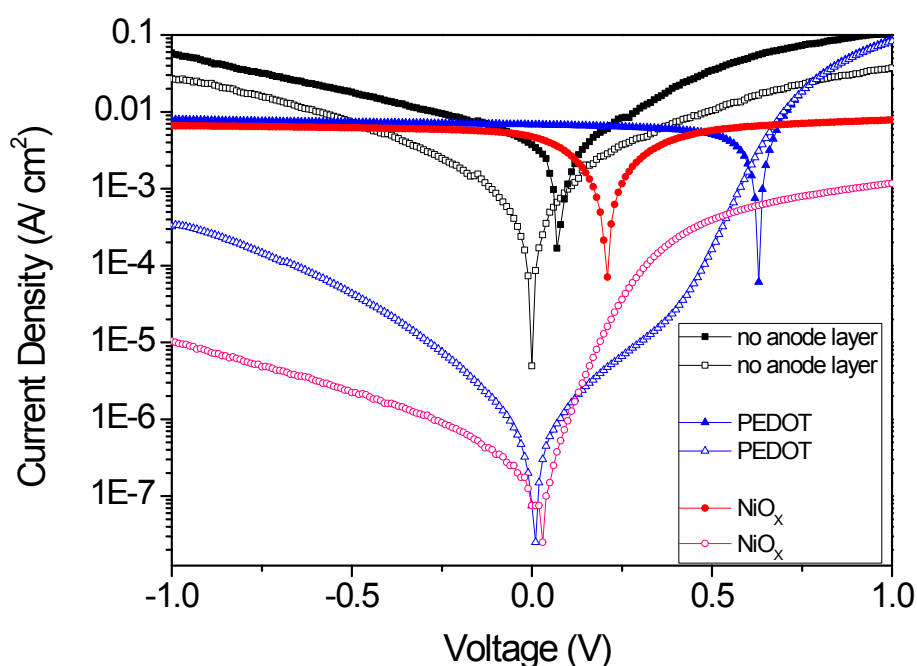

**Fig S1.** J–V characteristics of devices with different anode interlayers (solid dots represent illuminated conditions and open circles represent dark conditions): no anode layer, PEDOT:PSS, and NiO<sub>x</sub> under dark and illuminated conditions at 1 sun (100 mW/cm<sup>2</sup>).

**Table S1.** J–V characteristics of devices with different anode interlayers

|                                      | Photocurrent density (A/cm <sup>2</sup> ) | Dark current density (A/cm <sup>2</sup> ) |
|--------------------------------------|-------------------------------------------|-------------------------------------------|
| ITO/ P3HT:PCBM/Al                    | $1.80 \times 10^{-2}$                     | $9.25 \times 10^{-3}$                     |
| ITO/ PEDOT:PSS/ P3HT:PCBM/Al         | $1.87 \times 10^{-2}$                     | $4.28 \times 10^{-4}$                     |
| ITO/ NiO <sub>x</sub> / P3HT:PCBM/Al | $6.57 \times 10^{-3}$                     | $9.67 \times 10^{-6}$                     |

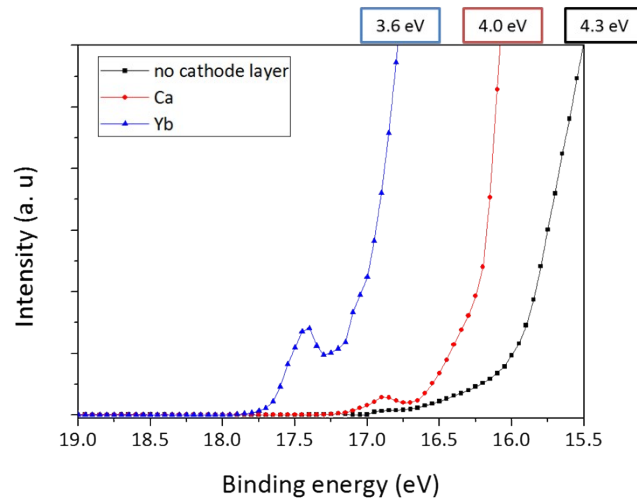

**Fig S2.** High-binding-energy cut-off region of the UPS spectra of an Al cathode (no interlayer) and Ca and Yb cathode interlayers for the P3HT:PC<sub>60</sub>BHJ.

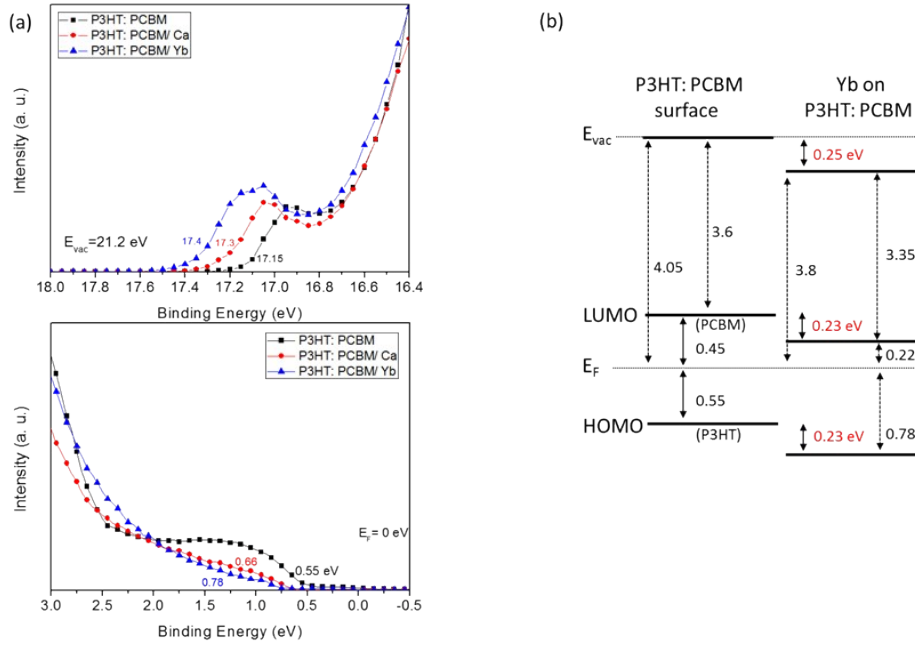

**Fig S3.** (a) UPS spectra of P3HT:PC<sub>60</sub>BM, P3HT:PC<sub>60</sub>BM/Ca, and P3HT:PC<sub>60</sub>BM/Yb on ITO glass. (b) Energy band diagram deduced from the interface between P3HT:PCBM and Yb

**Table S2.** Parameters of the J–V characteristics for OPDs under reverse voltages

| $J_{\text{dark}}$ (A/ cm <sup>2</sup> ) | no cathode layer      | Ca                    | Yb                    |
|-----------------------------------------|-----------------------|-----------------------|-----------------------|
| 0 V                                     | $5.00 \times 10^{-8}$ | $5.75 \times 10^{-9}$ | $1.25 \times 10^{-9}$ |
| -1 V                                    | $9.67 \times 10^{-6}$ | $3.25 \times 10^{-7}$ | $3.65 \times 10^{-8}$ |
| -2 V                                    | $3.33 \times 10^{-5}$ | $1.11 \times 10^{-6}$ | $8.31 \times 10^{-8}$ |
| -3 V                                    | $7.10 \times 10^{-5}$ | $3.17 \times 10^{-6}$ | $1.13 \times 10^{-7}$ |

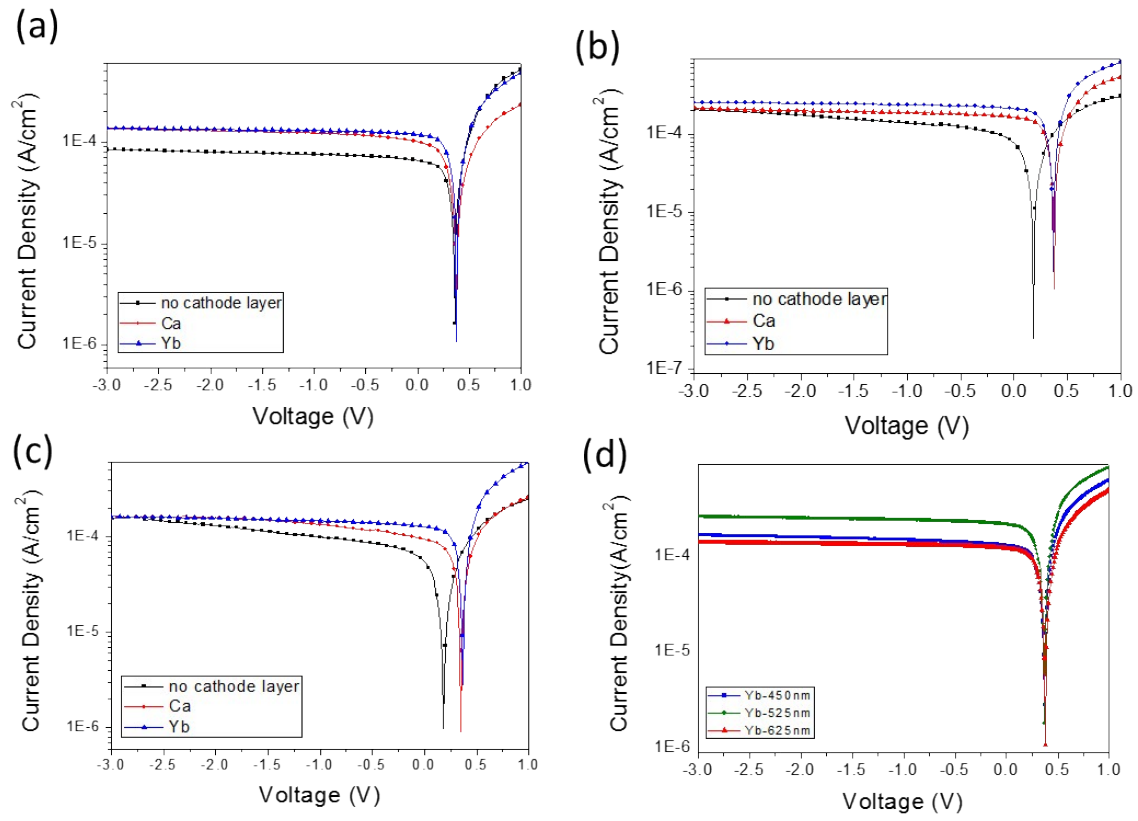

**Fig S4.** J-V characteristics for organic photodiodes with several cathode interlayers under 1 sun of illumination (a)–(c) with red, green, and blue color filters (a transmittance of approximately 55%) under 1 sun of illumination, respectively. (d) The parameter for each wavelength of the OPD with the Yb layer.

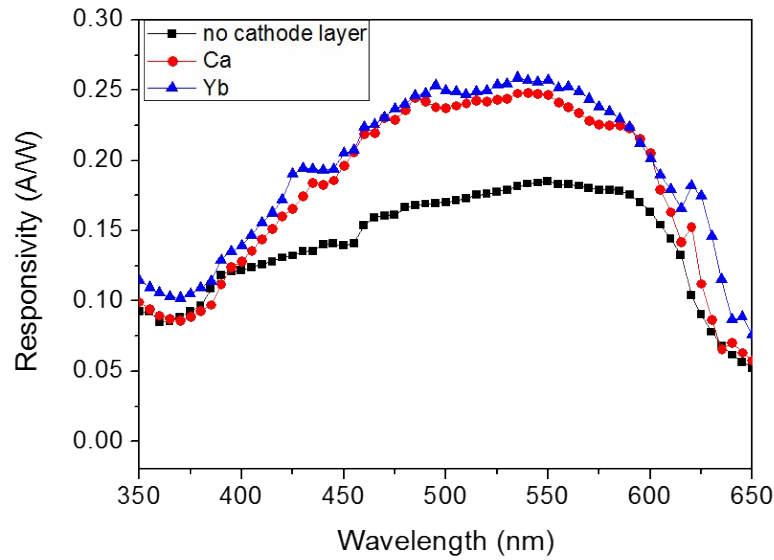

**Fig S5.** Responsivity of the OPD with different cathode interlayers at 1.2 mW/cm<sup>2</sup>.
